# Supplementary material for: Transcriptional Silencing of Transposons by Piwi and Maelstrom and Its Impact on Chromatin State and Gene Expression
Source: PubMed Central journal article supplement — Cell. 2012 Nov 21;151(5):964–80. doi: 10.1016/j.cell.2012.10.040 (PMC3504300; doi:10.1016/j.cell.2012.10.040), 2012-11-21
Supplement: mmc1.pdf [file mmc1.pdf]

**Table S1. Fly Stocks Used, Related to Experimental Procedures**

|                                                                                                                                                                                                                                                                                                                                                                       |
|-----------------------------------------------------------------------------------------------------------------------------------------------------------------------------------------------------------------------------------------------------------------------------------------------------------------------------------------------------------------------|
| <i>tj</i> -GAL4 (DGRC # 104055);                                                                                                                                                                                                                                                                                                                                      |
| <i>tj</i> -Gal4; <i>gypsy-lacZ</i> (Olivieri et al, 2010)                                                                                                                                                                                                                                                                                                             |
| MTD-GAL4 (Ni et al., 2011);                                                                                                                                                                                                                                                                                                                                           |
| <i>armi</i> RNAi (VDRC # 16205);                                                                                                                                                                                                                                                                                                                                      |
| <i>mael</i> RNAi (VDRC # 100907 (KK));                                                                                                                                                                                                                                                                                                                                |
| <i>mael</i> RNAi (VDRC # 18198 (GD));;                                                                                                                                                                                                                                                                                                                                |
| <i>mael</i> <sup>M391</sup> / <i>mael</i> <sup>Df</sup> (Findley et al, 2003)                                                                                                                                                                                                                                                                                         |
| <i>mael</i> <sup>Df</sup> (DGRC: 150235) (rescue experiments)                                                                                                                                                                                                                                                                                                         |
| Short hairpin RNAi lines were cloned into the Valium-22 vector (Ni et al, 2011) modified with a white selection marker and integrated into the <i>atp2</i> landing site reported in Markstein et al (2008). The hairpin sequence for <i>mael</i> was CCGAAGCTTGTTTCGCTTTCTA                                                                                           |
| <i>y,w,hsFlp122;;act&lt;CD2&gt;GAL4, UAS-GFP</i> (Olivieri et al, 2010)                                                                                                                                                                                                                                                                                               |
| FLAG-eGFP-Mael was cloned by inserting an N-terminal FLAG-eGFP cassette via bacterial recombineering into a genomic rescue construct (3L : 22712955 -22721349) which was integrated into the <i>atp40</i> landing site. For the $\Delta$ HMG rescue construct, the first 240 nucleotides of <i>maelstrom</i> were deleted from the original FLAG-eGFP-Mael construct. |
| <i>flamenco</i> restrictive and permissive flies (Sarot et al, 2004)                                                                                                                                                                                                                                                                                                  |
| All flies were aged 5 days at 25°C before analysis.                                                                                                                                                                                                                                                                                                                   |

**Table S2. Primers for qPCR Analysis, Related to Experimental Procedures**

| <b>GENE</b>       | <b>Primer</b> | <b>Sequence</b>          |
|-------------------|---------------|--------------------------|
| <i>rp49</i>       | rp49_fwd      | CCGCTTCAAGGGACAGTATCTG   |
|                   | rp49_rev      | ATCTCGCCGCAGTAAACGC      |
| <i>ZAM</i>        | ZAM_fwd       | ACTTGACCTGGATACACTCACAAC |
|                   | ZAM_rev       | GAGTATTACGGCGACTAGGGATAC |
| <i>HeT-A</i>      | HeT-A_fwd     | CGCGCGGAACCCATCTTCAGA    |
|                   | HeT-A_rev     | CGCCGCAGTCGTTTGGTGAGT    |
| <i>DM412</i>      | 412_fwd       | AAAGTACGGTCCAATGAAGACG   |
|                   | 412_rev       | GTGGTGATGAGCTGTTGATGTT   |
| <i>actin5C</i>    | Act5C_fwd     | AAGTTGCTGCTCTGGTTGTCG    |
|                   | Act5C_rev     | GCCACACGCAGCTCATTGTAG    |
| <i>mdg1</i>       | Mdg1_fwd      | AAACTCCAACCTCCCAATCCG    |
|                   | Mdg1_rev      | AGTGGTCCCTCGCAGTCGTT     |
| <i>gypsy</i>      | Gypsy_fwd     | CAACAATCTGAACCCACCAATCT  |
|                   | Gypsy_rev     | TATGAACATCATGAGGGTGAACG  |
| <i>piwi locus</i> | Piwi_fwd      | TTACCCGTA CTTCGTCCTGATG  |
|                   | Piwi_rev      | TTGGGCACCGAAATAACTCA     |
| <i>mael locus</i> | Mael_fwd      | AGACCACACTTCCTTTGCC      |
|                   | Mael_rev      | GTGCGTCGGTAAGTTCCTAG     |
| <i>reporter 1</i> | 1_fwd         | CGTTAGGTCCTGTTTCATTGTTTA |
|                   | 1_rev         | CGTCAGCATTGTTTCATACAAAG  |
| <i>reporter 2</i> | 2_fwd         | CTCGGCAACAGTATATTTGTGGT  |
|                   | 2_rev         | AGGCGATTAAGTTGGGTAACG    |

**Table S3. Probes Used for Northern Blots, Related to Experimental Procedures**

| <b>Probe</b>        | <b>Sequence</b>            |
|---------------------|----------------------------|
| <i>mir-310</i>      | AAAGGCCGGGAAGTGTGCAATA     |
| <i>tj-piRNAs</i>    | GGTAATGGGAATGCACTTCTCTTGAA |
| <i>Idefix-piRNA</i> | AAACTACTGGCAATCGTTTGGGAA   |

**Table S4. siRNAs Used for RNAi in OSCs, Related to Experimental Procedures**

| <b>GENE</b> | <b>siRNA</b>    | <b>Sequence</b>       |
|-------------|-----------------|-----------------------|
| eGFP        | eGFP_guide      | ACUUCAGGGUCAGCUUGCCTT |
|             | eGFP_passenger  | GGCAAGCUGACCCUGAAGUTT |
| <i>armi</i> | Armi_guide      | UAAACUUAGCUUGACAGCGTT |
|             | Armi_passenger  | CGCUGUCAAGCUAAGUUUATT |
| <i>mael</i> | Mael1_guide     | UUCUUCGAACAAGCGAAAGUU |
|             | Mael1_passenger | GAAGCUUGUUCGCUUUCUAUU |
|             | Mael2_guide     | UCCCAAUACUACAAGCAUU   |
|             | Mael2_passenger | GGUUUAUGAUGUUCGUAAAUU |
| <i>piwi</i> | Piwi_guide      | CACCUUCACGCCUGGGAGCTT |
|             | Piwi_passenger  | GCUCCCAGGCGUGAAGGUGTT |

**Table S5. Sequencing Data Used in This Study, Related to Experimental Procedures**

| <b>cells</b> | <b>methods</b>   | <b>Genotype</b>           |
|--------------|------------------|---------------------------|
| OSC          | RNA-seq          | ctrl-KD                   |
|              |                  | <i>piwi</i> -KD           |
|              |                  | <i>armi</i> -KD           |
|              |                  | <i>mael</i> -KD           |
|              | GRO-seq          | wild-type                 |
|              |                  | <i>piwi</i> -KD           |
|              | Rpb3 ChIP-seq    | ctrl-KD                   |
|              |                  | ctrl-KD                   |
|              |                  | <i>piwi</i> -KD           |
|              |                  | <i>piwi</i> -KD           |
|              |                  | <i>mael</i> -KD           |
|              |                  | <i>mael</i> -KD           |
|              | H3K9me3 ChIP-seq | ctrl-KD                   |
|              |                  | ctrl-KD                   |
|              |                  | <i>piwi</i> -KD           |
|              |                  | <i>piwi</i> -KD           |
|              |                  | <i>mael</i> -KD           |
|              |                  | <i>mael</i> -KD           |
|              | input ChIP-seq   | ctrl-KD                   |
|              |                  | ctrl-KD                   |
|              |                  | <i>piwi</i> -KD           |
|              |                  | <i>piwi</i> -KD           |
|              |                  | <i>mael</i> -KD           |
|              |                  | <i>mael</i> -KD           |
|              | DNA-seq          | wild-type                 |
|              | small RNA-seq    | wild-type                 |
| fly          | Rpb3 ChIP-seq    | tj-GAL4> <i>tej</i> RNAi  |
|              |                  | tj-GAL4> <i>tej</i> RNAi  |
|              |                  | tj-GAL4> <i>armi</i> RNAi |
|              |                  | tj-GAL4> <i>armi</i> RNAi |
|              | small RNA-seq    | <i>flam</i> (permissive)  |
|              | small RNA-seq    | <i>flam</i> (reactive)    |

**Table S6. Coordinates of Heterochromatin Used in This Study, Related to Figure 5**

| <b>chromosome</b> | <b>start</b> | <b>end</b> |
|-------------------|--------------|------------|
| <b>chr2L</b>      | 20100000     | 23011544   |
| <b>chr2LHet</b>   | 1            | 368872     |
| <b>chr2R</b>      | 1            | 2400000    |
| <b>chr2RHet</b>   | 1            | 3288761    |
| <b>chr3L</b>      | 22500000     | 24543557   |
| <b>chr3LHet</b>   | 1            | 2555491    |
| <b>chr3RHet</b>   | 1            | 2517507    |
| <b>chrU</b>       | 1            | 10049037   |
| <b>chrX</b>       | 21300000     | 22422827   |
| <b>chrXHet</b>    | 1            | 204112     |
| <b>chrYHet</b>    | 1            | 347038     |
